# Supplementary material for: Emotional vocalizations alter behaviors and neurochemical release into the amygdala
Source: eLife. 2024 Jul 15;12:RP88838. doi: 10.7554/eLife.88838 (PMC11249735; doi:10.7554/eLife.88838)
Supplement: Figure 1—source data 1. [file elife-88838-fig1-data1.xlsx]

## Sheet: Voalization_Types
Syllable Types in Vocal Exemplars used in playback (Figure 1C)
Syllable type	Context		Syllable type	Context
Complex	Mating		MFVH	Restraint
Chevron	Mating		MFV	Restraint
Complex	Mating		Flat	Restraint
Complex	Mating		MFV	Restraint
Chevron	Mating		MFV	Restraint
Chevron	Mating		MFV	Restraint
Chevron	Mating		Flat	Restraint
LFH	Mating		MFV	Restraint
Chevron	Mating		MFV	Restraint
LFH	Mating		MFV	Restraint
1 Step	Mating		Flat	Restraint
1 Step	Mating		MFV	Restraint
LFH	Mating		Flat	Restraint
Chevron	Mating		MFV	Restraint
LFH	Mating		MFV	Restraint
Chevron	Mating		MFV	Restraint
Complex	Mating		MFV	Restraint
Chevron	Mating		MFV	Restraint
1 Step	Mating		MFV	Restraint
LFH	Mating		Noisy	Restraint
Flat	Mating		Noisy	Restraint
Complex	Mating		Noisy	Restraint
LFH	Mating		Noisy	Restraint
Complex	Mating		Noisy	Restraint
Chevron	Mating		Noisy	Restraint
Complex	Mating		Noisy	Restraint
LFH	Mating		LFHN	Restraint
Complex	Mating		Noisy	Restraint
Chevron	Mating		Noisy	Restraint
Chevron	Mating		MFV	Restraint
LFH	Mating		LFH	Restraint
Chevron	Mating		MFV	Restraint
Complex	Mating		Noisy	Restraint
LFH	Mating		LFH	Restraint
Complex	Mating		Noisy	Restraint
Chevron	Mating		Noisy	Restraint
LFH	Mating		Flat	Restraint
Complex	Mating		Flat	Restraint
Up FM	Mating		Flat	Restraint
Chevron	Mating		Up FM	Restraint
LFH	Mating		Flat	Restraint
Chevron	Mating		LFHN	Restraint
Up FM	Mating		1 StepNH	Restraint
Down FM	Mating		Flat	Restraint
Chevron	Mating		Flat	Restraint
Complex	Mating		Short	Restraint
LFH	Mating		Noisy	Restraint
Short	Mating		MFV	Restraint
Chevron	Mating		MFV	Restraint
Chevron	Mating		FlatH	Restraint
Complex	Mating		MFV	Restraint
Chevron	Mating		MFV	Restraint
LFH	Mating		>2 step	Restraint
Complex	Mating		Noisy	Restraint
LFH	Mating		MFV	Restraint
1 Step	Mating		MFV	Restraint
LFH	Mating		MFV	Restraint
1 Step	Mating		LFH	Restraint
1 Step	Mating		LFHN	Restraint
LFH	Mating		LFHN	Restraint
Chevron	Mating		LFH	Restraint
Chevron	Mating		mfv	Restraint
Chevron	Mating		LFH	Restraint
LFH	Mating		LFH	Restraint
Chevron	Mating		Noisy	Restraint
Chevron	Mating		Noisy	Restraint
Complex	Mating		MFV	Restraint
1 Step	Mating		MFV	Restraint
LFH	Mating		Noisy	Restraint
Up FM	Mating		Flat	Restraint
Chevron	Mating		Flat	Restraint
LFH	Mating		MFV	Restraint
Chevron	Mating		Noisy	Restraint
LFH	Mating		Up FMN	Restraint
Down FM	Mating		LFH	Restraint
Flat	Mating		Noisy	Restraint
Up FM	Mating		MFV	Restraint
Complex	Mating		LFHN	Restraint
Chevron	Mating		MFV	Restraint
Chevron	Mating		MFV	Restraint
Complex	Mating		MFV	Restraint
Up FM	Mating		LFHN	Restraint
Up FM	Mating		LFH	Restraint
Up FM	Mating		LFH	Restraint
Up FM	Mating		Down FM	Restraint
Chevron	Mating		Noisy	Restraint
Chevron	Mating		LFHN	Restraint
2 Step	Mating		LFHN	Restraint
Complex	Mating		MFV	Restraint
Chevron	Mating		LFHN	Restraint
2 Step	Mating		LFH	Restraint
Chevron	Mating		LFHN	Restraint
Flat	Mating		LFHN	Restraint
Complex	Mating		MFV	Restraint
LFH	Mating		MFV	Restraint
Chevron	Mating		MFV	Restraint
2 Step	Mating		MFV	Restraint
2 Step	Mating		MFV	Restraint
LFH	Mating		MFV	Restraint
Complex	Mating		Flat	Restraint
LFH	Mating		LFH	Restraint
LFH	Mating		Short	Restraint
Complex	Mating		LFH	Restraint
Complex	Mating		MFV	Restraint
LFH	Mating		seq	Restraint
LFH	Mating		Noisy	Restraint
2 Step	Mating		MFV	Restraint
2 Step	Mating		ShortH	Restraint
LFH	Mating		MFV	Restraint
1 Step	Mating		Flat	Restraint
LFH	Mating		Flat	Restraint
Complex	Mating		mfv	Restraint
LFH	Mating		2 Step	Restraint
Complex	Mating		MFV	Restraint
LFH	Mating		Flat	Restraint
Chevron	Mating		MFV	Restraint
LFH	Mating		Flat	Restraint
Chevron	Mating		FlatH	Restraint
1 Step	Mating		FlatH	Restraint
Chevron	Mating		Flat	Restraint
2 Step	Mating		MFV	Restraint
Chevron	Mating		U!H	Restraint
Chevron	Mating		MFV	Restraint
LFH	Mating		2 Step	Restraint
Chevron	Mating		MFV	Restraint
2 Step	Mating		2 Step	Restraint
LFH	Mating		MFV	Restraint
Complex	Mating		2 Step	Restraint
Chevron	Mating		FlatH	Restraint
LFH	Mating		MFV	Restraint
Complex	Mating		FlatH	Restraint
Chevron	Mating		2 Step	Restraint
Complex	Mating		FlatH	Restraint
LFH	Mating		2 Step	Restraint
Complex	Mating		FlatH	Restraint
LFH	Mating		2 Step	Restraint
Chevron	Mating		FlatH	Restraint
Up FM	Mating		2 Step	Restraint
Up FM	Mating		2 Step	Restraint
LFH	Mating		mfv	Restraint
Up FM	Mating		1 Step	Restraint
Complex	Mating		FlatH	Restraint
Chevron	Mating		2 Step	Restraint
Flat	Mating		2 Step	Restraint
Up FM	Mating		MFV	Restraint
Up FM	Mating		MFV	Restraint
LFH	Mating		MFV	Restraint
Short	Mating		Flat	Restraint
LFH	Mating		MFV	Restraint
Up FM	Mating		FlatH	Restraint
Down FM	Mating		FlatH	Restraint
Up FM	Mating		1 Step	Restraint
Flat	Mating		1 Step	Restraint
Chevron	Mating		FlatH	Restraint
Down FM	Mating		MFV	Restraint
Chevron	Mating		MFV	Restraint
LFH	Mating		MFV	Restraint
Up FM	Mating		1 Step	Restraint
Chevron	Mating		MFV	Restraint
Complex	Mating		FlatH	Restraint
Flat	Mating		2 Step	Restraint
Up FM	Mating		MFV	Restraint
Up FM	Mating		MFV	Restraint
LFH	Mating		mfv	Restraint
Complex	Mating		FlatH	Restraint
Up FM	Mating		2 Step	Restraint
Down FM	Mating		2 Step	Restraint
LFH	Mating		MFV	Restraint
Down FM	Mating		FlatH	Restraint
Up FM	Mating		MFV	Restraint
LFH	Mating		2 Step	Restraint
Chevron	Mating		MFV	Restraint
Chevron	Mating		MFV	Restraint
Flat	Mating		MFV	Restraint
Up FM	Mating		FlatH	Restraint
Up FM	Mating		MFV	Restraint
Up FM	Mating		FlatHN	Restraint
Down FM	Mating		MFV	Restraint
Up FM	Mating		2 Step	Restraint
Flat	Mating		MFV	Restraint
Up FM	Mating		FlatHN	Restraint
LFH	Mating		2 Step	Restraint
Up FM	Mating		2 Step	Restraint
Up FM	Mating		MFV	Restraint
LFH	Mating		FlatH	Restraint
Chevron	Mating		2 Step	Restraint
Up FM	Mating		>2 step	Restraint
LFH	Mating		MFV	Restraint
Up FM	Mating		>2 step	Restraint
Up FM	Mating		LFH	Restraint
LFH	Mating		FlatH	Restraint
Up FM	Mating		>2 step	Restraint
LFH	Mating		Flat	Restraint
LFH	Mating		MFV	Restraint
Flat	Mating		2 Step	Restraint
Chevron	Mating		MFV	Restraint
Reverse Chevron	Mating		2 Step	Restraint
Complex	Mating		Flat	Restraint
Complex	Mating		MFV	Restraint
Complex	Mating		1 Step	Restraint
Chevron	Mating		MFV	Restraint
1 Step	Mating		>2 step	Restraint
1 Step	Mating		2 Step	Restraint
1 Step	Mating		2 Step	Restraint
LFH	Mating		MFV	Restraint
Complex	Mating		MFV	Restraint
LFH	Mating		MFV	Restraint
Chevron	Mating		FlatHN	Restraint
LFH	Mating		FlatH	Restraint
Complex	Mating		MFV	Restraint
Chevron	Mating		MFV	Restraint
Chevron	Mating		ChevronN	Restraint
LFH	Mating		FlatN	Restraint
1 Step	Mating		Noisy	Restraint
1 Step	Mating		Noisy	Restraint
Chevron	Mating		Noisy	Restraint
Chevron	Mating		Noisy	Restraint
LFH	Mating		Noisy	Restraint
LFH	Mating		FlatH	Restraint
Complex	Mating		MFV	Restraint
Complex	Mating		MFV	Restraint
2 Step	Mating		MFV	Restraint
Complex	Mating		MFV	Restraint
1 Step	Mating		MFV	Restraint
Complex	Mating		MFV	Restraint
Chevron	Mating		MFV	Restraint
Flat	Mating		MFV	Restraint
Complex	Mating		MFV	Restraint
LFH	Mating		MFV	Restraint
Complex	Mating		MFV	Restraint
Chevron	Mating		MFV	Restraint
LFH	Mating		MFV	Restraint
Flat	Mating		MFV	Restraint
Flat	Mating		MFV	Restraint
Chevron	Mating		MFV	Restraint
Complex	Mating		MFV	Restraint
LFH	Mating		MFV	Restraint
Up FM	Mating		MFV	Restraint
Chevron	Mating		MFV	Restraint
LFH	Mating		MFV	Restraint
Chevron	Mating		MFV	Restraint
Chevron	Mating		MFV	Restraint
LFH	Mating		MFV	Restraint
Chevron	Mating		MFV	Restraint
Flat	Mating		MFV	Restraint
Complex	Mating		MFV	Restraint
LFH	Mating		MFV	Restraint
Chevron	Mating		MFV	Restraint
Flat	Mating		MFV	Restraint
Chevron	Mating		MFV	Restraint
Chevron	Mating		MFV	Restraint
2 Step	Mating		MFV	Restraint
Chevron	Mating		MFV	Restraint
Chevron	Mating		MFV	Restraint
Down FM	Mating		MFV	Restraint
Flat	Mating		MFV	Restraint
Chevron	Mating		MFV	Restraint
Up FM	Mating		MFV	Restraint
Complex	Mating		MFV	Restraint
Chevron	Mating		MFV	Restraint
2 Step	Mating		MFV	Restraint
Chevron	Mating		MFV	Restraint
2 Step	Mating		MFV	Restraint
>2 step	Mating		MFV	Restraint
2 Step	Mating		MFV	Restraint
>2 step	Mating		MFV	Restraint
1 Step	Mating		MFV	Restraint
2 Step	Mating		MFV	Restraint
>2 step	Mating		MFV	Restraint
Complex	Mating		MFV	Restraint
2 Step	Mating		MFV	Restraint
2 Step	Mating		MFV	Restraint
2 Step	Mating		MFV	Restraint
>2 step	Mating		MFV	Restraint
2 Step	Mating		MFV	Restraint
1 Step	Mating		MFV	Restraint
2 Step	Mating		MFV	Restraint
2 Step	Mating		MFV	Restraint
1 Step	Mating		MFV	Restraint
2 Step	Mating		MFV	Restraint
2 Step	Mating		MFV	Restraint
2 Step	Mating		MFV	Restraint
Chevron	Mating		MFV	Restraint
Up FM	Mating		MFV	Restraint
LFH	Mating		MFV	Restraint
Up FM	Mating		MFV	Restraint
Flat	Mating		MFV	Restraint
Complex	Mating		MFV	Restraint
LFH	Mating		Noisy	Restraint
Up FM	Mating		MFV	Restraint
2 Step	Mating		ChevronN	Restraint
LFH	Mating		MFV	Restraint
2 Step	Mating		LFHN	Restraint
Complex	Mating		1 StepN	Restraint
Up FM	Mating		Flat	Restraint
LFH	Mating		Up FM	Restraint
Up FM	Mating		MFV	Restraint
Up FM	Mating		1 StepN	Restraint
2 Step	Mating		Chevron	Restraint
Chevron	Mating		MFV	Restraint
Complex	Mating		MFV	Restraint
Complex	Mating		Chevron	Restraint
LFH	Mating		MFV	Restraint
Complex	Mating		MFV	Restraint
2 Step	Mating		MFV	Restraint
Complex	Mating		MFV	Restraint
2 Step	Mating		MFV	Restraint
LFH	Mating		MFV	Restraint
Complex	Mating		MFV	Restraint
Chevron	Mating		MFV	Restraint
Chevron	Mating		MFV	Restraint
Chevron	Mating		MFV	Restraint
Up FM	Mating		MFV	Restraint
Up FM	Mating		MFV	Restraint
Down FM	Mating		MFV	Restraint
Complex	Mating		MFV	Restraint
2 Step	Mating		MFV	Restraint
2 Step	Mating		MFV	Restraint
Complex	Mating		MFV	Restraint
>2 step	Mating		MFV	Restraint
2 Step	Mating		MFV	Restraint
1 Step	Mating		MFV	Restraint
>2 step	Mating		MFV	Restraint
1 Step	Mating		MFV	Restraint
1 Step	Mating		MFV	Restraint
Up FM	Mating		MFV	Restraint
>2 step	Mating		MFV	Restraint
>2 step	Mating		MFV	Restraint
>2 step	Mating		MFV	Restraint
>2 step	Mating		MFV	Restraint
2 Step	Mating		MFV	Restraint
Up FM	Mating		MFV	Restraint
Complex	Mating		MFV	Restraint
Chevron	Mating		MFV	Restraint
Chevron	Mating		MFV	Restraint
Up FM	Mating		MFV	Restraint
Up FM	Mating		MFV	Restraint
Complex'H	Mating		MFV	Restraint
Down FM	Mating		MFV	Restraint
Up FM	Mating		MFV	Restraint
LFH	Mating		MFV	Restraint
2 Step	Mating		MFV	Restraint
LFH	Mating		MFV	Restraint
LFH	Mating		MFV	Restraint
LFH	Mating		MFV	Restraint
Up FM	Mating		MFV	Restraint
LFH	Mating		MFV	Restraint
Up FM	Mating		MFV	Restraint
Chevron	Mating		MFV	Restraint
1 Step	Mating		MFV	Restraint
Chevron	Mating		MFV	Restraint
Complex	Mating		MFV	Restraint
Reverse Chevron	Mating		MFV	Restraint
LFH	Mating		MFV	Restraint
Flat	Mating		MFV	Restraint
Complex	Mating		MFV	Restraint
Complex	Mating		MFV	Restraint
Chevron	Mating		MFV	Restraint
Up FM	Mating		MFV	Restraint
Up FM	Mating		MFV	Restraint
LFH	Mating		MFV	Restraint
Up FM	Mating		MFV	Restraint
Up FM	Mating		MFV	Restraint
Chevron	Mating		MFV	Restraint
Complex	Mating		MFV	Restraint
1 Step	Mating		MFV	Restraint
1 Step	Mating		MFV	Restraint
LFH	Mating		MFV	Restraint
Chevron	Mating		MFV	Restraint
LFH	Mating		MFV	Restraint
Chevron	Mating		MFV	Restraint
LFH	Mating		MFV	Restraint
Chevron	Mating		MFV	Restraint
LFH	Mating		LFH	Restraint
LFH	Mating		MFV	Restraint
Chevron	Mating		MFV	Restraint
LFH	Mating		MFV	Restraint
1 Step	Mating		MFV	Restraint
LFH	Mating		MFV	Restraint
Complex	Mating		MFV	Restraint
LFH	Mating		MFV	Restraint
Chevron	Mating		MFV	Restraint
Chevron	Mating		MFV	Restraint
LFH	Mating		Flat	Restraint
Complex	Mating		MFV	Restraint
1 Step	Mating		FlatH	Restraint
LFH	Mating		MFV	Restraint
1 Step	Mating		MFV	Restraint
1 Step	Mating		MFV	Restraint
Complex	Mating		Down FM	Restraint
LFH	Mating		MFV	Restraint
2 Step	Mating		MFV	Restraint
Up FM	Mating		Flat	Restraint
Chevron	Mating		MFV	Restraint
LFH	Mating		MFV	Restraint
Chevron	Mating		MFV	Restraint
Complex	Mating		MFV	Restraint
LFH	Mating		MFV	Restraint
Chevron	Mating		MFV	Restraint
Chevron	Mating		MFV	Restraint
Chevron	Mating		MFV	Restraint
Complex	Mating		MFV	Restraint
Complex	Mating		MFV	Restraint
LFH	Mating		MFV	Restraint
Chevron	Mating		MFV	Restraint
2 Step	Mating		MFV	Restraint
LFH	Mating		MFV	Restraint
Chevron	Mating		MFV	Restraint
Up FM	Mating		MFV	Restraint
LFH	Mating		MFV	Restraint
Short	Mating		MFV	Restraint
Complex	Mating		MFV	Restraint
LFH	Mating		MFV	Restraint
Complex	Mating		MFV	Restraint
Chevron	Mating		MFV	Restraint
Chevron	Mating		MFV	Restraint
LFH	Mating		MFV	Restraint
Up FM	Mating		MFV	Restraint
Up FM	Mating		MFV	Restraint
Chevron	Mating		MFV	Restraint
LFH	Mating		MFV	Restraint
Flat	Mating		MFV	Restraint
Chevron	Mating		MFV	Restraint
Complex	Mating		MFV	Restraint
Complex	Mating		MFV	Restraint
LFH	Mating		MFV	Restraint
Chevron	Mating		MFV	Restraint
Down FM	Mating		MFV	Restraint
Chevron	Mating		MFV	Restraint
Chevron	Mating		MFV	Restraint
Up FM	Mating		MFV	Restraint
LFH	Mating		MFV	Restraint
Flat	Mating		MFV	Restraint
Chevron	Mating		MFV	Restraint
Chevron	Mating		MFV	Restraint
Down FM	Mating		MFV	Restraint
Up FM	Mating		MFV	Restraint
Chevron	Mating		MFV	Restraint
Complex	Mating		MFV	Restraint
Complex	Mating		MFV	Restraint
Down FM	Mating		MFV	Restraint
Down FM	Mating		MFV	Restraint
Complex	Mating		MFV	Restraint
Complex	Mating		MFV	Restraint
Flat	Mating		MFV	Restraint
Flat	Mating		MFV	Restraint
Down FM	Mating		MFV	Restraint
Chevron	Mating		MFV	Restraint
Chevron	Mating		MFV	Restraint
Chevron	Mating		MFV	Restraint
Complex	Mating		MFV	Restraint
Complex	Mating		MFV	Restraint
Complex	Mating		MFV	Restraint
Chevron	Mating		MFV	Restraint
Chevron	Mating		MFV	Restraint
Chevron	Mating		MFV	Restraint
Complex	Mating		MFV	Restraint
Chevron	Mating		MFV	Restraint
Complex	Mating		MFV	Restraint
Up FM	Mating		MFV	Restraint
Up FM	Mating		MFV	Restraint
Complex	Mating		MFV	Restraint
Chevron	Mating		MFV	Restraint
Complex	Mating		MFV	Restraint
LFH	Mating		MFV	Restraint
Chevron	Mating		MFV	Restraint
Up FM	Mating		MFV	Restraint
Complex	Mating		MFV	Restraint
Chevron	Mating		MFV	Restraint
Flat	Mating		MFV	Restraint
Complex	Mating		MFV	Restraint
LFH	Mating		MFV	Restraint
1 Step	Mating		MFV	Restraint
Down FM	Mating		MFV	Restraint
FlatH	Mating		MFV	Restraint
Flat	Mating		MFV	Restraint
Chevron	Mating		MFV	Restraint
Complex	Mating		MFV	Restraint
Down FM	Mating		MFV	Restraint
Up FM	Mating		MFV	Restraint
Up FM	Mating		MFV	Restraint
Chevron	Mating		MFV	Restraint
LFH	Mating		MFV	Restraint
Flat	Mating		MFV	Restraint
Flat	Mating		MFV	Restraint
Up FM	Mating		MFV	Restraint
Chevron	Mating		MFV	Restraint
Noisy	Mating		MFV	Restraint
Complex	Mating		MFV	Restraint
Chevron	Mating		MFV	Restraint
Chevron	Mating		MFV	Restraint
1 Step	Mating		MFV	Restraint
LFH	Mating		MFV	Restraint
Complex	Mating		MFV	Restraint
1 Step	Mating		MFV	Restraint
1 Step	Mating		MFV	Restraint
Chevron	Mating		MFV	Restraint
2 Step	Mating		MFV	Restraint
1 Step	Mating		MFV	Restraint
Chevron	Mating		MFV	Restraint
1 Step	Mating		MFV	Restraint
LFH	Mating		MFV	Restraint
Chevron	Mating		MFV	Restraint
Complex	Mating		MFV	Restraint
LFH	Mating		MFV	Restraint
Up FM	Mating		MFV	Restraint
Complex	Mating		MFV	Restraint
Up FM	Mating		MFV	Restraint
Chevron	Mating		MFV	Restraint
Chevron	Mating		MFV	Restraint
Down FM	Mating		MFV	Restraint
Chevron	Mating		MFV	Restraint
Flat	Mating		MFV	Restraint
Down FM	Mating		MFV	Restraint
Chevron	Mating		MFV	Restraint
LFH	Mating		MFV	Restraint
Up FM	Mating		MFV	Restraint
Complex	Mating		MFV	Restraint
Chevron	Mating		MFV	Restraint
Chevron	Mating		MFV	Restraint
LFH	Mating		MFV	Restraint
Down FM	Mating		MFV	Restraint
Flat	Mating		MFV	Restraint
Complex	Mating		MFV	Restraint
Up FM	Mating		MFV	Restraint
Down FM	Mating		MFV	Restraint
LFH	Mating		MFV	Restraint
Flat	Mating		MFV	Restraint
1 Step	Mating		MFV	Restraint
Reverse Chevron	Mating		MFV	Restraint
LFH	Mating		MFV	Restraint
Flat	Mating		MFV	Restraint
1 Step	Mating		MFV	Restraint
Flat	Mating		MFV	Restraint
LFH	Mating		MFV	Restraint
Up FM	Mating		MFV	Restraint
Up FM	Mating		MFV	Restraint
Flat	Mating		MFV	Restraint
LFH	Mating		MFV	Restraint
Down FM	Mating		MFV	Restraint
Down FM	Mating		MFV	Restraint
Flat	Mating		MFV	Restraint
Chevron	Mating		MFV	Restraint
LFH	Mating		MFV	Restraint
1 Step	Mating		MFV	Restraint
			MFV	Restraint
			MFV	Restraint
			MFV	Restraint
			MFV	Restraint
			MFV	Restraint
			MFV	Restraint
			MFV	Restraint
			MFV	Restraint
			MFV	Restraint
			MFV	Restraint
			MFV	Restraint
			MFV	Restraint
			MFV	Restraint
			MFV	Restraint
			MFV	Restraint
			MFV	Restraint
			MFV	Restraint
			MFV	Restraint
			MFV	Restraint
			MFV	Restraint
			MFV	Restraint
			MFV	Restraint
			MFV	Restraint
			MFV	Restraint
			MFV	Restraint
			MFV	Restraint
			MFV	Restraint
			MFV	Restraint
			MFV	Restraint
			MFV	Restraint
			MFV	Restraint
			MFV	Restraint
			MFV	Restraint
			MFV	Restraint
			MFV	Restraint
			MFV	Restraint
			MFV	Restraint
			MFV	Restraint
			MFV	Restraint
			MFV	Restraint
			MFV	Restraint
			MFV	Restraint
			MFV	Restraint
			MFV	Restraint
			MFV	Restraint
			Flat	Restraint
			MFV	Restraint
			MFV	Restraint
			MFV	Restraint
			MFV	Restraint
			MFV	Restraint
			MFV	Restraint
			MFV	Restraint
			MFV	Restraint
			MFV	Restraint
			MFV	Restraint
			MFV	Restraint
			MFV	Restraint
			MFV	Restraint
			MFV	Restraint
			MFV	Restraint
			MFV	Restraint
			MFV	Restraint
			MFV	Restraint
			MFV	Restraint
			MFV	Restraint
			MFV	Restraint
			MFV	Restraint
			MFV	Restraint
			MFV	Restraint
			MFV	Restraint
			MFV	Restraint
			MFV	Restraint
			MFV	Restraint
			MFV	Restraint
			MFV	Restraint
			MFV	Restraint
			MFV	Restraint
