# Supplementary material for: Emotional vocalizations alter behaviors and neurochemical release into the amygdala
Source: eLife. 2024 Jul 15;12:RP88838. doi: 10.7554/eLife.88838 (PMC11249735; doi:10.7554/eLife.88838)
Supplement: Figure 3—source data 4. [file elife-88838-fig3-data4.xlsx]

## Sheet: Behavioral counts and Video-Tra
Animal#	Sex	Context	Estrous	Experience	Period		TotalDistance	TotalTimeCenter	TotalTimeCorner	Self-Grooming	Still-and_alert	Attending	Rearing	Locomotion	Strentch-Attend	Flinching
						Units	Pixels	Seconds	Seconds	Events	Events	Events	Events	Events	Events	Events
						per Time		10-minute Pre, Stim 1, and Stim 2 periods					Average values per stimulus block (3 equal-length blocks in each of Pre, Stim 1, and Stim 2 periods).				See Materials and Methods and Fig 1E for details
1266	Female	Mating	estrus	EXP	Pre		31604	597.863	0	0	1	0	0	0	0	0
1266	Female	Mating	estrus	EXP	Stim1		80683	148.481	26.9604	0	15.6667	4.33333	0.666667	4	7.66667	4
1266	Female	Mating	estrus	EXP	Stim2		78411	0	0.266933	0	20	0	0	0	0	2.66667
1295	Female	Mating	estrus	EXP	Pre		23819	33.0997	48.1815	8	7	0	16	6.66667	0	0
1295	Female	Mating	estrus	EXP	Stim1		16274	6.90691	14.8147	0.666667	20.6667	8.33333	1	0.333333	2.66667	9
1295	Female	Mating	estrus	EXP	Stim2		31611	8.27482	0	0	20.6667	5	0.666667	1	2.33333	2.66667
1305	Female	Mating	estrus	EXP	Pre		75507	3.60345	451.813	3	17	0.333333	0.333333	2.66667	2.33333	1
1305	Female	Mating	estrus	EXP	Stim1		99002	0	550.209	2	19.6667	11	0	1.66667	0.333333	6
1305	Female	Mating	estrus	EXP	Stim2		65456	0	171.202	12	9	7	1	5.33333	1	3.66667
1312	Female	Mating	estrus	EXP	Pre		76127	84.7853	6.70676	1.66667	2.66667	0	12.6667	7.66667	9.66667	0
1312	Female	Mating	estrus	EXP	Stim1		36827	459.094	0	0	15.6667	6	0.333333	2	6	7.33333
1312	Female	Mating	estrus	EXP	Stim2		14702	537.039	0	1.33333	13	1	1	3.33333	12.3333	7.33333
1317	Female	Mating	estrus	EXP	Pre		69119	10.3435	26.2259	11.3333	5.66667	0	5.33333	4.33333	1.33333	0
1317	Female	Mating	estrus	EXP	Stim1		87487	0	147.112	1.66667	15.3333	3.33333	0.666667	4	1.33333	6.66667
1317	Female	Mating	estrus	EXP	Stim2		61015	0	0	0	20	0	0	0	0.333333	3
1319	Female	Mating	estrus	EXP	Pre		31360	88.8882	82.8487	11	1.66667	0	18.3333	11.6667	4.33333	0.666667
1319	Female	Mating	estrus	EXP	Stim1		14889	162.894	1.3013	2	3	5.33333	7.66667	7	33.3333	9
1319	Female	Mating	estrus	EXP	Stim2		27300	283.081	1.20122	4.33333	3.33333	3.66667	13.6667	11	22.3333	2
1360	Female	Mating	estrus	INEXP	Pre		129876	0	0	4.33333	17.3333	0	0	0	1.66667	0
1360	Female	Mating	estrus	INEXP	Stim1		143945	0.0667	0.200207	0	21	11.3333	0.333333	0.666667	4.66667	1.66667
1360	Female	Mating	estrus	INEXP	Stim2		110901	15.6822	42.8431	6.66667	3.33333	8.66667	5.66667	9.33333	16.6667	0
1364	Female	Mating	estrus	INEXP	Pre		75328	42.4419	62.4277	5.66667	2.66667	0.666667	28	11.3333	0.333333	0
1364	Female	Mating	estrus	INEXP	Stim1		110010	1.10109	26.8932	0	17.6667	10.3333	2.66667	3	1	6.33333
1364	Female	Mating	estrus	INEXP	Stim2		161516	0	0	0	19.3333	0.666667	0	0.333333	0.333333	6.66667
1366	Female	Mating	estrus	INEXP	Pre		72726	114.68	20.52	0	10.6667	3.33333	17	11.3333	3	0
1366	Female	Mating	estrus	INEXP	Stim1		68295	72.6387	25.592	1.66667	9	8.33333	16	7.33333	3.66667	0
1366	Female	Mating	estrus	INEXP	Stim2		69715	63.029	54.3535	1.33333	10.3333	6	23	8	0	0
1379	Female	Mating	estrus	INEXP	Pre		254746	1.63502	522.292	5.33333	15	0.333333	4.66667	2	3.33333	0
1379	Female	Mating	estrus	INEXP	Stim1		268180	0.10018	90.6243	0.333333	21.6667	9.66667	1.66667	4	6	1.66667
1379	Female	Mating	estrus	INEXP	Stim2		188465	0	73.4074	9	2.66667	4	13	7.66667	6.66667	0.333333
1401	Female	Mating	estrus	INEXP	Pre		93661	24.9248	58.5252	2	10	3.66667	20.3333	11.6667	1.33333	0
1401	Female	Mating	estrus	INEXP	Stim1		112002	16.8168	7.74092	0	17.3333	20	7	4	3.33333	0.333333
1401	Female	Mating	estrus	INEXP	Stim2		102480	5.73912	103.836	3.33333	6	5.33333	17.6667	9.33333	0.666667	0
1402	Female	Mating	estrus	INEXP	Pre		99514	91.1904	70.47	6.66667	6.33333	5	14	5.66667	0	0
1402	Female	Mating	estrus	INEXP	Stim1		126569	52.986	534.597	1	24	10.6667	0.333333	1.33333	0.666667	1.33333
1402	Female	Mating	estrus	INEXP	Stim2		131025	0	203.869	2	21	1.66667	2	1	0.666667	0.666667
1403	Female	Mating	estrus	INEXP	Pre		85171	32.432	132.665	8.33333	4.66667	6.33333	20.3333	9.66667	0.666667	0
1403	Female	Mating	estrus	INEXP	Stim1		94316	26.3929	20.9542	1.33333	15.3333	22.3333	10.6667	5.33333	2.66667	0
1403	Female	Mating	estrus	INEXP	Stim2		88736	25.5252	117.784	8	4.33333	6.33333	23.6667	11	0.333333	0
1404	Female	Mating	estrus	INEXP	Pre		16523	0	0	0	22.6667	0.333333	3.33333	0	1.33333	0.666667
1404	Female	Mating	estrus	INEXP	Stim1		11076	0	0	0	24.3333	1.33333	4	0	1	1.33333
1404	Female	Mating	estrus	INEXP	Stim2		10370	0	0	0	23.3333	0.333333	4	0	0	3.33333
1270	Male	Mating	N/A	EXP	Pre		99612	2.20223	329.699	4.33333	7.33333	6	9	9	0.333333	0
1270	Male	Mating	N/A	EXP	Stim1		97875	9.84323	194.795	8	3.33333	7	10.6667	12.3333	0.666667	1.66667
1270	Male	Mating	N/A	EXP	Stim2		134460	0	449.953	2	15.3333	1	1	2.66667	0	0.666667
1280	Male	Mating	N/A	EXP	Pre		112724	4.20404	102.701	9	0	0	7.66667	4.66667	0.666667	0
1280	Male	Mating	N/A	EXP	Stim1		118457	15.4152	376.27	11	3.66667	2.33333	14	5.66667	0	0.666667
1280	Male	Mating	N/A	EXP	Stim2		110714	8.17443	315.211	14	1	0.333333	9.66667	5	0	0
1282	Male	Mating	N/A	EXP	Pre		93202	0.033329	599.934	3.66667	17.3333	0	0	0	0	0.333333
1282	Male	Mating	N/A	EXP	Stim1		135106	0.06675	240.774	2.66667	11.3333	11	3.33333	5.33333	7.66667	5.33333
1282	Male	Mating	N/A	EXP	Stim2		123443	13.3465	79.9138	3.33333	5.66667	5.33333	27	8.66667	3	3
1290	Male	Mating	N/A	EXP	Pre		85701	114.98	25.5583	2.33333	2	0	26	15.6667	0.333333	0
1290	Male	Mating	N/A	EXP	Stim1		88777	171.835	35.8356	3.33333	4.33333	3.33333	27	15.3333	0.333333	0
1290	Male	Mating	N/A	EXP	Stim2		90483	167.599	50.4832	2.66667	3	1.33333	24.6667	13	0	0.333333
1316	Male	Mating	N/A	EXP	Pre		39006	2.96962	353.685	20	0	0	3.66667	1.66667	2	0
1316	Male	Mating	N/A	EXP	Stim1		87792	13.0463	25.392	1.33333	17	2	3.33333	2.66667	0.666667	3.66667
1316	Male	Mating	N/A	EXP	Stim2		112562	0	0	0	19.6667	0	0	0	0.333333	3
1340	Male	Mating	N/A	EXP	Pre		102010	2.30238	16.3829	5.66667	0	0	34.6667	5.33333	0	0
1340	Male	Mating	N/A	EXP	Stim1		104654	0	423.922	8.66667	11.6667	5	9.66667	2.33333	0	0.333333
1340	Male	Mating	N/A	EXP	Stim2		108622	0	509.773	0.333333	21	0	0.333333	0	0.333333	0.333333
1350	Male	Mating	N/A	EXP	Pre		62310	54.9541	86.4856	6	1	1.66667	27	8.66667	0	0
1350	Male	Mating	N/A	EXP	Stim1		77738	16.5498	62.4289	3	2.66667	13.3333	19	3	0	0.333333
1350	Male	Mating	N/A	EXP	Stim2		75866	56.189	94.2595	3.33333	2.66667	6.66667	25.6667	8.66667	0	0.666667
1357	Male	Mating	N/A	INEXP	Pre		93490	12.8796	38.0047	8.66667	10	0.666667	4.33333	3.33333	1.66667	0
1357	Male	Mating	N/A	INEXP	Stim1		122432	0	0	0.333333	22.3333	4.66667	0.333333	0	3.33333	1.33333
1357	Male	Mating	N/A	INEXP	Stim2		116526	0	16.0826	0	21.3333	0	0	0	0.333333	1.33333
1359	Male	Mating	N/A	INEXP	Pre		128810	12.1787	110.344	15.3333	0.333333	0.333333	8	9	0	0
1359	Male	Mating	N/A	INEXP	Stim1		108418	0	275.509	0.333333	19	6.66667	0	0.666667	0	3
1359	Male	Mating	N/A	INEXP	Stim2		97393	0	600.067	0	20.6667	0.666667	0	0	0	1.33333
1369	Male	Mating	N/A	INEXP	Pre		107024	63.4634	74.6411	2.33333	2.66667	1	27	10.3333	2	0
1369	Male	Mating	N/A	INEXP	Stim1		94466	14.114	7.37415	3.33333	15	5.66667	6.33333	2.66667	3.66667	4.33333
1369	Male	Mating	N/A	INEXP	Stim2		114967	59.9595	66.8661	0	8.66667	4.66667	19.6667	16.6667	3.66667	1
1380	Male	Mating	N/A	INEXP	Pre		125891	0	47.9476	0	21	0.333333	0	0	0	0
1380	Male	Mating	N/A	INEXP	Stim1		132328	0.633938	547.442	2.33333	19	7.33333	0.333333	0	0	4.33333
1380	Male	Mating	N/A	INEXP	Stim2		70054	0	599.626	14.6667	6.33333	0	0.333333	0	0	0
1383	Male	Mating	N/A	INEXP	Pre		127408	30.931	268.936	4.66667	2.33333	0	34.3333	16	0	0
1383	Male	Mating	N/A	INEXP	Stim1		200985	0	330.832	0.333333	18.6667	14.3333	2.66667	0.666667	1.33333	1.66667
1383	Male	Mating	N/A	INEXP	Stim2		191882	0	225.827	5	16.3333	0.666667	2.66667	0.666667	1.66667	0.666667
1391	Male	Mating	N/A	INEXP	Pre		120208	0	81.6158	1	18.3333	1.33333	0.666667	1.33333	2.33333	0
1391	Male	Mating	N/A	INEXP	Stim1		148252	0	574.637	10.3333	11.3333	3.66667	1.33333	0.333333	0	0
1391	Male	Mating	N/A	INEXP	Stim2		100815	7.10705	177.075	5.66667	7	7.33333	18.3333	7.66667	0.666667	0
1409	Male	Mating	N/A	INEXP	Pre		24785	4.57125	0.200219	0	21	0.333333	0	0.666667	2	0.666667
1409	Male	Mating	N/A	INEXP	Stim1		71555	0	480.445	0	20.3333	5.66667	0	0	3.66667	1.66667
1409	Male	Mating	N/A	INEXP	Stim2		83778	0	599.83	0	21.6667	0	0	0	0	2.33333
1267	Female	Mating	non-estrus	EXP	Pre		76586	22.7893	272.272	10.6667	1.33333	0.333333	4	4.66667	2.66667	0
1267	Female	Mating	non-estrus	EXP	Stim1		72165	8.10807	4.33753	0.333333	18	4.33333	0.666667	1.33333	3	1
1267	Female	Mating	non-estrus	EXP	Stim2		22735	0	0	0	20	0	0	0	0.333333	1.66667
1271	Female	Mating	non-estrus	EXP	Pre		74640	0	0	15	5.33333	0	0	0	1	0
1271	Female	Mating	non-estrus	EXP	Stim1		80134	0	0.100102	0.666667	20	3.33333	0	0	1.66667	0
1271	Female	Mating	non-estrus	EXP	Stim2		104857	0	5.03807	0	20	0	0	0	0.333333	1.33333
1289	Female	Mating	non-estrus	EXP	Pre		85470	27.2271	226.693	8.66667	1.33333	0.333333	16.6667	6	0	0
1289	Female	Mating	non-estrus	EXP	Stim1		88698	9.24259	90.0899	4	14.6667	4	4	1	0	6.33333
1289	Female	Mating	non-estrus	EXP	Stim2		93169	11.4779	364.164	14.6667	3.33333	0	3	1.66667	0	0.333333
1328	Female	Mating	non-estrus	EXP	Pre		99971	578.336	0.266888	4.33333	17	2.33333	1	3.33333	7.66667	0
1328	Female	Mating	non-estrus	EXP	Stim1		89188	563.222	0	9.33333	6.33333	10	0.666667	3.33333	13.6667	0
1328	Female	Mating	non-estrus	EXP	Stim2		73254	597.822	0	5	14.3333	2.33333	0	1.33333	3.66667	0.333333
1358	Female	Mating	non-estrus	EXP	Pre		107888	0	61.5277	2	20.6667	0	0	1	2.33333	0
1358	Female	Mating	non-estrus	EXP	Stim1		114718	3.20314	464.393	6.33333	20.3333	2.33333	0.666667	2	2	0.333333
1358	Female	Mating	non-estrus	EXP	Stim2		95020	5.97259	292.79	12	4.33333	3.33333	11	11.3333	0.333333	1.66667
1410	Female	Mating	non-estrus	EXP	Pre		92524	139.739	124.19	3.66667	11.3333	2	19.6667	14	0.333333	0
1410	Female	Mating	non-estrus	EXP	Stim1		67006	251.283	43.577	2.66667	17	10.6667	7.66667	8	0	0.333333
1410	Female	Mating	non-estrus	EXP	Stim2		105284	34.3344	108.675	6.66667	2	2.33333	14.3333	9.66667	0.666667	0.333333
1272	Male	Restraint	N/A	EXP	Pre		62693	0	599.867	1	6	0	0	0	0	0
1272	Male	Restraint	N/A	EXP	Stim1		84697	0	599.767	0	20.3333	2.66667	0	0	1	2
1272	Male	Restraint	N/A	EXP	Stim2		74801	0	596.564	0	20	0	0	0	0	0.333333
1281	Male	Restraint	N/A	EXP	Pre		40300	436.07	3.13647	7	6.33333	0	7	2.33333	14.6667	0
1281	Male	Restraint	N/A	EXP	Stim1		86476	128.161	4.80493	6.66667	12	3	5.66667	2	4.33333	1.33333
1281	Male	Restraint	N/A	EXP	Stim2		115186	12.2788	0	0	19.6667	0	0	0	0.666667	0.666667
1297	Male	Restraint	N/A	EXP	Pre		8393	62.4281	42.3414	14.6667	6	0	0.333333	0	0	0
1297	Male	Restraint	N/A	EXP	Stim1		13999	0	0	0.333333	20.3333	2	0	0	0	4.33333
1297	Male	Restraint	N/A	EXP	Stim2		17673	0	0	0	20	0	0	0	0.333333	2.33333
1308	Male	Restraint	N/A	EXP	Pre		78689	578.811	0	8.66667	9.66667	0	0	2.33333	6.66667	0
1308	Male	Restraint	N/A	EXP	Stim1		24166	597.696	0	0	20.3333	3.33333	0	0	1	11.6667
1308	Male	Restraint	N/A	EXP	Stim2		72938	130.697	0	0	19.3333	0	1.33333	2.33333	3.66667	2.66667
1333	Male	Restraint	N/A	EXP	Pre		102010	2.30238	16.3829	4.66667	14.6667	0	1	0.333333	0.333333	0
1333	Male	Restraint	N/A	EXP	Stim1		104654	0	423.922	0	17.6667	3	0.333333	0	0.333333	16.3333
1333	Male	Restraint	N/A	EXP	Stim2		108622	0	509.773	0	20	0	0	0	0	6.66667
1348	Male	Restraint	N/A	EXP	Pre		74472	211.776	23.523	12.3333	7.66667	1.66667	15	3.66667	1.33333	0.666667
1348	Male	Restraint	N/A	EXP	Stim1		99366	239.469	20.5201	3.66667	13.6667	9.33333	17.3333	2.66667	0.333333	10.6667
1348	Male	Restraint	N/A	EXP	Stim2		95200	41.4074	49.716	11.6667	3.66667	1.66667	21.6667	3	0	2.33333
1365	Male	Restraint	N/A	INEXP	Pre		75328	42.4419	62.4277	1.66667	5	0	18.6667	9.66667	13.6667	0
1365	Male	Restraint	N/A	INEXP	Stim1		110010	1.10109	26.8932	0.666667	17.6667	2.33333	6.66667	2.33333	4.66667	3.33333
1365	Male	Restraint	N/A	INEXP	Stim2		161516	0	0	0	21.3333	2	0	0	0	7.33333
1367	Male	Restraint	N/A	INEXP	Pre		105958	0	0	3.33333	16.6667	0	0.666667	0	0.333333	0
1367	Male	Restraint	N/A	INEXP	Stim1		126441	0	0	0	23	4.33333	0	0	0.666667	6.66667
1367	Male	Restraint	N/A	INEXP	Stim2		127566	0	0	0	23	2	0	0	0	4
1368	Male	Restraint	N/A	INEXP	Pre		103925	0	529.323	21.6667	1.66667	0	1	1.33333	0	0
1368	Male	Restraint	N/A	INEXP	Stim1		139547	0	599.96	16	8	1.33333	0	0	0	6
1368	Male	Restraint	N/A	INEXP	Stim2		141466	0	600.06	0	21.6667	0	0	0	0.333333	3.33333
1378	Male	Restraint	N/A	INEXP	Pre		254746	1.63502	522.292	17	0.666667	2	7.33333	2.66667	0.666667	0
1378	Male	Restraint	N/A	INEXP	Stim1		268180	0.10018	90.6243	2	16	6	4.33333	2.33333	2.66667	6.66667
1378	Male	Restraint	N/A	INEXP	Stim2		188465	0	73.4074	0	21.3333	0	0	0	0	3
1381	Male	Restraint	N/A	INEXP	Pre		94949	7.9411	124.057	5	2.33333	1	19.3333	13.6667	0.333333	0
1381	Male	Restraint	N/A	INEXP	Stim1		87572	9.7763	201.467	8	3.66667	18	27	16.3333	1.33333	3.66667
1381	Male	Restraint	N/A	INEXP	Stim2		85278	15.5155	183.315	7	2	1.66667	33.6667	18.3333	1.33333	0
1384	Male	Restraint	N/A	INEXP	Pre		135491	1.90192	29.5622	0	19.3333	8.33333	0.333333	0.333333	1.33333	0
1384	Male	Restraint	N/A	INEXP	Stim1		144390	0.767631	576.437	0	23.3333	35.3333	0	0	0.333333	12.6667
1384	Male	Restraint	N/A	INEXP	Stim2		146988	0	277.775	3.33333	18.3333	7.66667	1.33333	0	1	1.66667
1390	Male	Restraint	N/A	INEXP	Pre		58214	0.500511	57.4905	1.66667	17.6667	0.666667	2.66667	2.33333	1.33333	0
1390	Male	Restraint	N/A	INEXP	Stim1		46020	0	47.2135	0	21.3333	9.66667	1.33333	2.33333	2.33333	0.333333
1390	Male	Restraint	N/A	INEXP	Stim2		46729	0	164.697	7.66667	6	3.66667	18	8.66667	0.666667	0
